# Supplementary material for: Exploring the bearing of subjective preferences on site selection processes
Source: Copernicus journal article supplement (doi:10.5194/sand-2-95-2023), 2023-09-06
Supplement: Supplementary file 1 [file sand-2-95-2023-supplement.pdf]

Supplement of Saf. Nucl. Waste Disposal, 2, 95–95, 2023  
<https://doi.org/10.5194/sand-2-95-2023-supplement>  
© Author(s) 2023. CC BY 4.0 License.

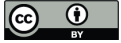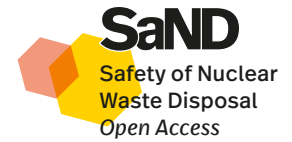

*Supplement of*

## **Exploring the bearing of subjective preferences on site selection processes**

**Martin Navarro et al.**

*Correspondence to:* Martin Navarro ([martin.navarro@base.bund.de](mailto:martin.navarro@base.bund.de))

The copyright of individual parts of the supplement might differ from the article licence.

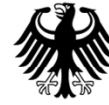

Federal Office  
for the Safety of  
Nuclear Waste Management

# Exploring the Bearing of Subjective Preferences on Site Selection Processes

**M. Navarro, S. Hotzel, U. Maurer-Rurack, G. Frieling, T. Weyand**  
*Federal Office for the Safety of Nuclear Waste Management (BASE)*

*Interdisciplinary Research Symposium on the Safety of Nuclear Disposal Practices safe<sup>ND</sup>*  
*13-15 September 2023*

# Justification | Objectivity of Decisions

In site selection decisions, we aim at **objectivity**. To ensure that:

- Decisions depend on the object only, and **cannot be influenced** by anybody's will.
  - Have a **fair game**. – (The rules of the game are set. The outcome depends only on the characteristics of the objects/sites.)
  - **All can agree** to the findings, because everybody would have decided the same way.
- Everybody can comprehend, understand – and accept

# Unavoidable Subjectivity

In decision theory, subjectivity is, in particular, involved in:

- Goal setting
- Balancing conflicting goals
- Finding evaluation criteria (indicators) for measuring goal achievement
- Weighing and aggregation of criteria
- Evaluating uncertainties (risk seeking or risk avoiding attitude?)

→ Subjective preferences influence site selection

## Example 1: Conflicting Goals

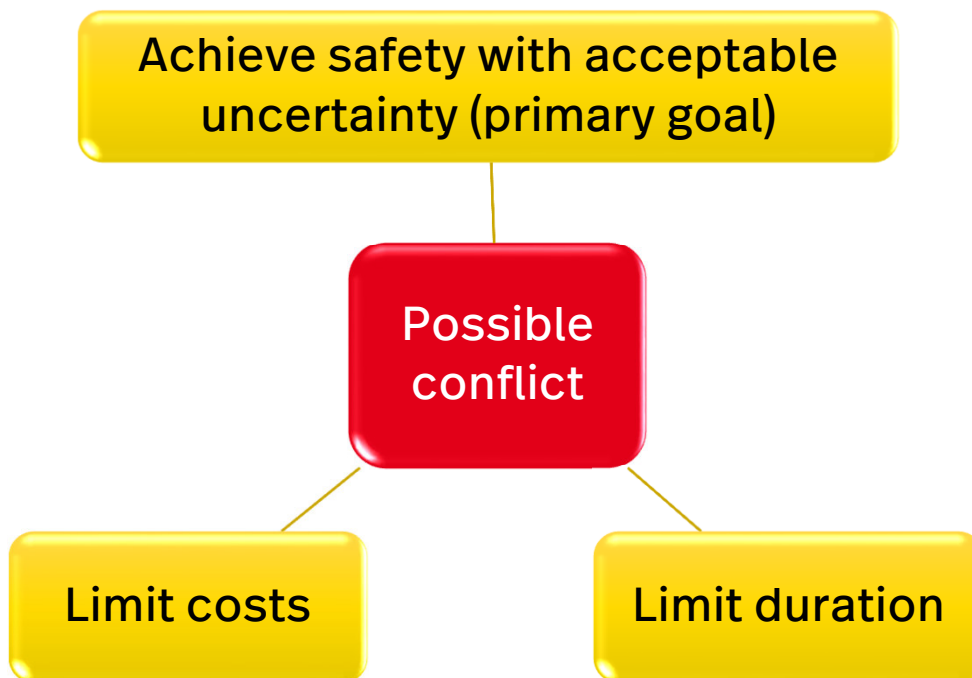

Balancing the conflicting goals is guided by **subjective** preferences.

## Example 1: Conflicting Goals

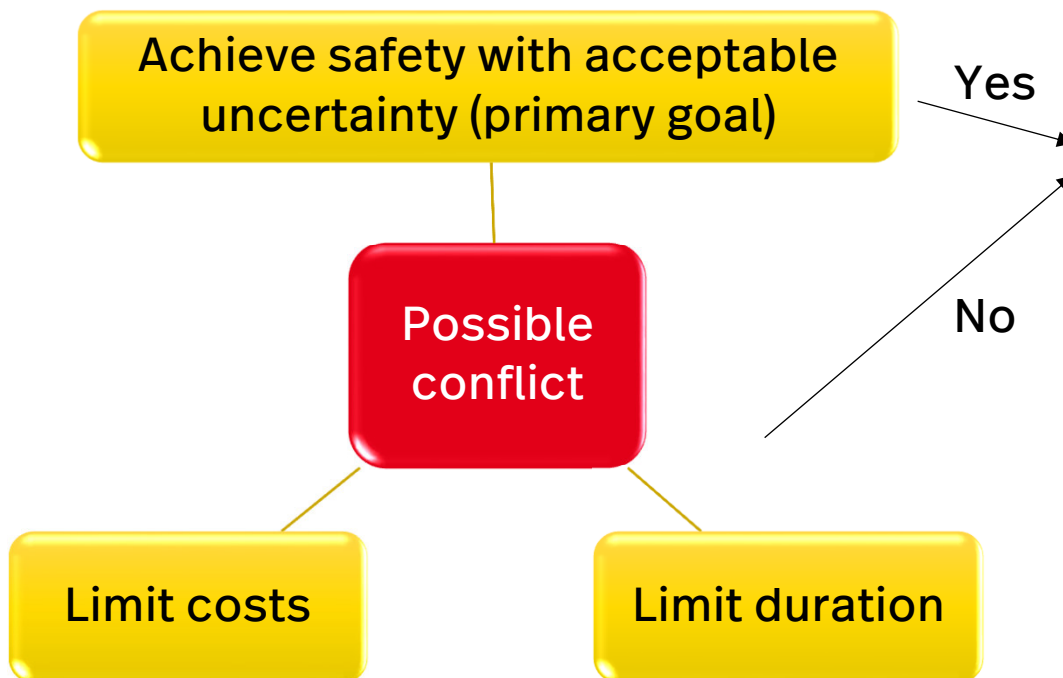

Should we carry out in-depth site exploration in many candidate sites ?

Balancing the conflicting goals is guided by **subjective** preferences.

## Example 2: Deciding on Criteria / Weighing of Criteria

Overburden: Thick clay layer

Confinement providing rock zone

Repository

**Is a thick clay layer in the overburden relevant to safety?**

## Example 2: Deciding on Criteria / Weighing of Criteria

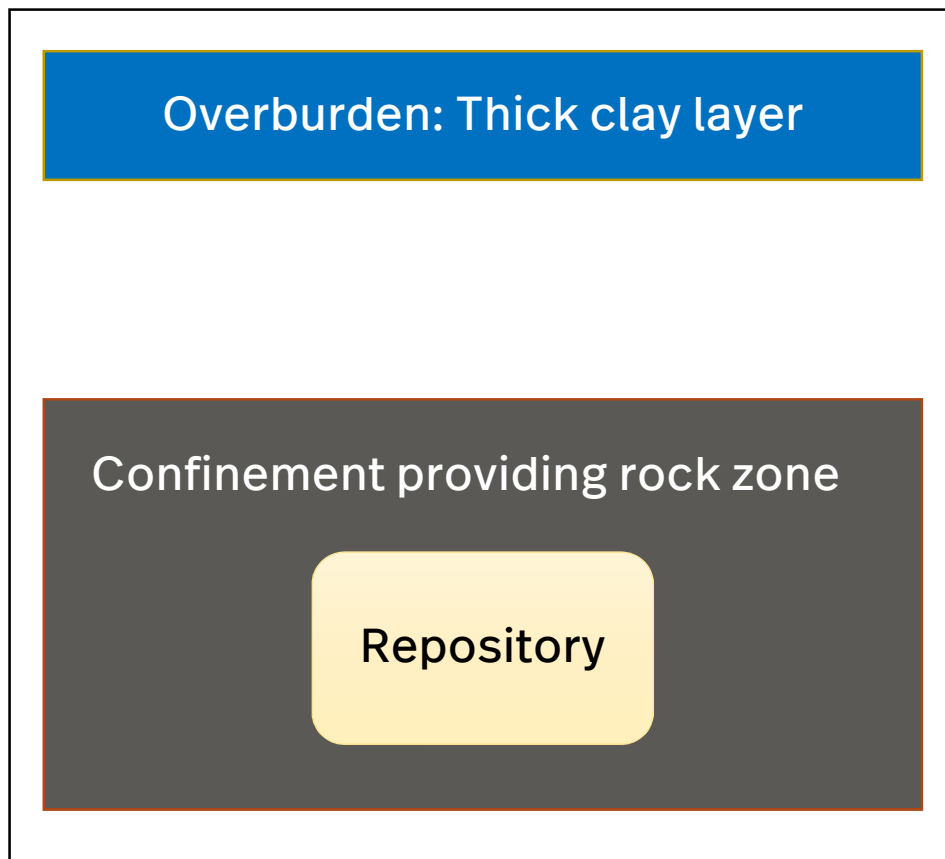

**Is a thick clay layer in the overburden relevant to safety?**

**No, should not be accounted for:**

- Integrity of the overburden not guaranteed
- No „official“ component, no safety function
- Most radionuclides will not travel that far in any scenario

**Yes, should be accounted for:**

- Will retard radionuclides in cases that have been overlooked (unknown unknowns)

**If yes:**

How relevant? Weighing? → **subjective**



## **Example 3: Can we say, (two sites are) “equally safe” ?**

Safety requirements = required level of safety (StandAG)

Are all sites that satisfy the safety requirements equally safe?

## Example 3: Can we say, (two sites are) “equally safe” ?

Safety requirements = required level of safety (StandAG)

Are all sites that satisfy the safety requirements equally safe? Two opinions:

**Yes:** We can define it that way:  
safe:= safe enough := fulfilling the required level of safety  
*(Safety is defined by the safety requirements)*

**No:** Repositories can have different safety levels,  
which cannot be measured directly through indicators.  
*(Safety cannot be measured directly. Indicators are always coarse measures.)*

→ **Subjective preferences differ**

# Conclusion:

**Safety evaluations and site selection decisions are partly subjective.**

## Regulations

- limit the permissible range of subjective beliefs
- but still give leeway to subjective evaluations

➔ Subjectivity expresses residual ambiguity about how to reach the goals within the regulatory framework.

# A Problem for Justification

- Subjective decisions can cause (non-desirable) ambiguity in site selection procedure
- How can we justify subjective claims?

## As a discussion starter:

**It is sufficient if we agree (on the tolerated subjective beliefs).**

- Decisions could be based on subjective beliefs that are tolerated by most/all („Compatible belief“)
  - Not necessary to share the same beliefs
- Agreement could act as justification for subjective beliefs in decision making

# Steps involved to find out agreement

1. Identifying where subjective beliefs play a role
2. Deciding who should agree
3. Finding agreement
  - Identify latitude in beliefs and common beliefs
  - Discuss and check for misapprehensions
  - Discuss and negotiate what might be acceptable subjective beliefs

# Supporting measures

## **1: Remove stigma from term “subjective”**

Subjective beliefs (judgements) are not necessarily

- unsound
- arbitrary

→ Subjective decisions, per se, do not make a selection process arbitrary.

## **2: Embrace subjectivity**

→ No need to attempt purely fact-based reasoning where subjectivity dominates.

# Project METIENS

**METIENS identifies where subjective beliefs play a role in safety assessment and site selection**

It does so after:

- Identifying, in principle, ways of eliminating sites
- Identifying, in principle, ways of assessing and comparing safety

Thank you  
for your attention !
